# Supplementary material
Source: PubMed Central journal article supplement (PMC2868531)
Supplement: embor201029-s1.pdf [file embor201029-s1.pdf]

## Supplementary information

### Methods

#### Evolutionary sequence analysis

Homologs of Jac1 were identified by TBLASTN searches with *S. cerevisiae* sequence as query against the completed genome sequence for each of the species listed in the text. When available, the refseq protein database was searched by BLASTP. Protein pairwise evolutionary distances were calculated with TREE-PUZZLE (Schmidt et al., 2002) under the Whelan and Goldman (WAG) (Whelan and Goldman, 2001) substitution matrix using 8 rate categories for the gamma distribution and invariable sites estimated from the data set. Model selection was performed according to the Akaike Information Criterion (AIC) values obtained with ProtTest (Abascal et al., 2005).

The Jac1 protein tree was inferred by maximum likelihood. Alignment was guided by structural information and was comprised of the J-domains and the C-terminal domains, save for the interdomain linker and the HPD-S variable loop. Model selection was based on the results obtained from ProTest (Abascal et al., 2005). We used PhyML (Guindon and Gascuel, 2003) under the LG (Le and Gascuel, 2008) model of protein evolution, with site-to-site rate variation modeled on a discrete gamma distribution (four categories for the shape parameter gamma and a proportion of invariant sites estimated from data). Tree topology was optimized by SPR branch swapping, and confidence in branch support was assessed with 100 bootstrap replicates.

#### Prediction of protein structure

For the homology modeling of proteins three factors influence the quality of the predicted structure: the evolutionary distance between the target and the template, the quality of sequence alignment of target to query protein, and the quality of the target structure (Chakravarty et al., 2005). Two solved structures of Jac1 orthologs, *Escherichia coli* HscB (PDB ID: 1fpo) (Cupp-Vickery and Vickery, 2000) and *Homo sapiens* Jac1 (PDB ID: 3bvo) (Bitto et al., 2008) are available at 1.8 Å and 3.0 Å resolution, respectively. The HscB protein was utilized as a template for modeling. To ensure the best sequence alignment between the target and the template, the target sequence was submitted to the GeneSilico metaserver, which is a gateway to a number of different structure prediction methods. For the actual fold recognition procedure, generates target-template alignments, the metaserver employed the following methods: FFAS03 (Rychlewski et al., 2000), SAM-T02 (Karplus et al., 2003), 3DPSSM (Kelley et al., 2000), INBGU (Fischer, 2000), FUGUE (Shi et al., 2001), mGEN-THREADER (Jones, 1999) and SPARKS (Zhou and Zhou, 2004). Alignments resulting from above calculations were compared and their quality estimated with Pcons5 (Lundstrom et al., 2001). The best scored sequence alignment was chosen and minor refinements, were done manually in the Swiss-PdbViewer (<http://www.expasy.org/spdbv>) (Guex and Peitsch, 1997), based on predictions of secondary structure performed with PSIPRED (McGuffin et al., 2000), PROFsec (Rost et al., 2004), Prof (Ouali and King, 2000), SABLE (Adamczak et al., 2004), JNET (Cuff and Barton, 2000), JUFO (Meiler and Baker, 2003), SAM-T02 (Karplus et al., 2003), taking into account natively disordered region recognition conducted with PONDR (Romero et al., 2004), DISOPRED (Ward et al., 2004), and solvent accessibility calculated with SABLE (Adamczak et al., 2004) and JPRED (Cuff et al., 1998). Protein structure models were calculated with MODELLER (Fiser and Sali, 2003) and their potential accuracy was evaluated with MetaMQAP (Pawlowski et al., 2008).

To assess the validity of our modeling protocol, we predicted the structure of human Jac1, using the existing *E. coli* structure as a template (Fig. S2). A comparison of the modeled and experimentally determined structures revealed an overall root mean square deviation between the matched backbone atoms of 1.3 Å, indicating the high level of similarity between them, hence high accuracy of the model (Fig. S2B). Having validated our approach, we proceeded to analyze Jac1<sub>Sc</sub> and Jac1<sub>Yl</sub>. According to MetaMQAP (Pawlowski et al., 2008), the models are predicted to exhibit the root mean square deviation of 2.4 Å and 3.3 Å to the true structures for Jac1<sub>Sc</sub> and Jac1<sub>Yl</sub>, respectively. Hence they could be used as medium-resolution working models for functional analyses.

### Biochemical assays

**Glycerol gradient centrifugation.** Glycerol gradient centrifugation was carried out as described in (Dutkiewicz et al., 2003). Purified proteins (Isu1<sub>Sc</sub>, Jac1<sub>Sc</sub>, and Jac1<sub>Yl</sub>), alone or in combination, were placed in a reaction mixture (80 µl) in buffer G (40 mM HEPES-KOH, pH 7.5, 100 mM KCl, 1 mM dithiothreitol, 10 mM MgCl<sub>2</sub>, 5% (v/v) glycerol), and incubated for 10 min at 25 °C. Then, 70 µl of this mixture was loaded onto a 3-ml linear 15-35% (v/v) glycerol gradient prepared in buffer G, and centrifuged at 2 °C in a Beckman SW60 rotor for 28 h at 46,000 rpm. Fractions (130 µl each) were collected from the top of the tube and their protein contents were analyzed by SDS-PAGE followed by silver staining.

**ATPase activity of Ssc1 and Ssq1.** The release of radioactive inorganic phosphate from [ $\gamma$ -<sup>32</sup>P]ATP was measured as described in (Viitanen et al., 1990). Reaction mixtures contained Ssc1<sub>Sc</sub> or Ssq1<sub>Sc</sub> at 0.5 µM, Isu1<sub>Sc</sub> at 10 µM, Mge1<sub>Sc</sub> at 0.5 µM and the indicated Jac1 protein at the indicated concentrations in buffer A (40 mM HEPES-KOH, pH 7.5, 100 mM KCl, 1 mM dithiothreitol, 10 mM MgCl<sub>2</sub>, 10% (v/v) glycerol). Reactions were initiated by the addition of ATP (2µCi, DuPont NEG-003H, 3000 Ci/mmol) to a final concentration of 120 µM. Incubation was carried out at 25 °C and the reaction terminated by the removal (at 5, 10, 15 and 20 min after initiation of the reaction) of 20-µl aliquots to an Eppendorfe tube containing 175 µl of 1 M perchloric acid and 1 mM sodium phosphate. After addition of 400 µl of 20 mM ammonium molybdate and 400 µl of isopropyl acetate, samples were mixed and the phases separated by a short centrifugation. An aliquot of the organic phase (150 µl), containing the radioactive orthophosphate-molybdate complex, was removed and radioactivity was determined by liquid scintillation counting. Control reactions lacking protein were included in all experiments.

### Legends to supplementary figures

Fig. S1 Alignment of selected Jac1 sequences. The alignment was prepared manually based on predicted structures. Number and position of helices (I-VII) and the inter-domain linker are indicated. Conserved amino acids are highlighted: 9/12 identical in black and 9/12 similar in grey (as defined by BLOSUM 62 matrix). Conserved HPD motif and universally conserved serine in helix III are indicated by asterisk.

Fig. S2 Predicted structures of Jac1 orthologs from *S. cerevisiae* and *Y. lipolytica*. (A) Structures of Jac1 orthologs from *E. coli* (PDB id: 1fpo) and *H. sapiens* (PDB id: 3bvo) obtained by X-ray crystallography. (B) Comparison of experimental structure and model of *H. sapiens* Jac1 homolog. Structure (light) as obtained by X-ray diffraction crystallography at 3 Å resolution (Bitto et al., 2008). Model structure (dark) was obtained by homology-based

computer modeling utilizing the solved structure of *E. coli* Jac1 ortholog (see A) as a template. The calculated RMS value for all backbone atoms was: 1.28 Å for entire protein, 0.9 Å for J-domain fragment, and 2 Å for C-terminus. Residues: 1-71, not present in the *E. coli* protein, were excluded from calculations. (C) Model structures of Jac1<sub>Sc</sub> and Jac1<sub>Yl</sub> obtained utilizing the solved structure of *E. coli* Jac1 ortholog as a template.

Fig. S3 Jac1 from *Y. lipolytica* efficiently binds Isu1 from *S. cerevisiae* and this interaction is not a limiting factor in the stimulation of the ATPase activity of Ssc1<sub>Sc</sub>. (A) Sedimentation of Isu1 and Jac1 from *Y. lipolytica* and *S. cerevisiae* (Isu<sub>Yl</sub>, Isu<sub>Sc</sub>, Jac1<sub>Yl</sub> and Jac1<sub>Sc</sub>). Reaction conditions were as described in Suppl. Methods. Fractions collected from the gradient were assayed by SDS-PAGE followed by silver staining. (B-C) Plots representing quantification of protein contents were assessed by densitometry analysis using Quantity One software (Bio-Rad). (D) Stimulation of the Ssc1<sub>Sc</sub> ATPase activity in the presence of Isu1<sub>Sc</sub> or Isu<sub>Yl</sub>. Reaction conditions as described in Suppl. Methods.

## References

- Abascal, F., Zardoya, R. and Posada, D. (2005) ProtTest: selection of best-fit models of protein evolution. *Bioinformatics*, **21**, 2104-2105.
- Adamczak, R., Porollo, A. and Meller, J. (2004) Accurate prediction of solvent accessibility using neural networks-based regression. *Proteins*, **56**, 753-767.
- Bitto, E., Bingman, C.A., Bittova, L., Kondrashov, D.A., Bannen, R.M., Fox, B.G., Markley, J.L. and Phillips, G.N., Jr. (2008) Structure of human J-type co-chaperone HscB reveals a tetracysteine metal-binding domain. *J Biol Chem*, **283**, 30184-30192.
- Chakravarty, S., Wang, L. and Sanchez, R. (2005) Accuracy of structure-derived properties in simple comparative models of protein structures. *Nucleic Acids Res*, **33**, 244-259.
- Cuff, J.A. and Barton, G.J. (2000) Application of multiple sequence alignment profiles to improve protein secondary structure prediction. *Proteins*, **40**, 502-511.
- Cuff, J.A., Clamp, M.E., Siddiqui, A.S., Finlay, M. and Barton, G.J. (1998) JPred: a consensus secondary structure prediction server. *Bioinformatics*, **14**, 892-893.
- Cupp-Vickery, J.R. and Vickery, L.E. (2000) Crystal structure of Hsc20, a J-type Co-chaperone from Escherichia coli. *J Mol Biol*, **304**, 835-845.
- Dutkiewicz, R., Schilke, B., Knieszner, H., Walter, W., Craig, E.A. and Marszalek, J. (2003) Ssq1, a mitochondrial Hsp70 involved in iron-sulfur (Fe/S) center biogenesis. Similarities to and differences from its bacterial counterpart. *J Biol Chem*, **278**, 29719-29727.
- Fischer, D. (2000) Hybrid fold recognition: combining sequence derived properties with evolutionary information. *Pac Symp Biocomput*, 119-130.
- Fiser, A. and Sali, A. (2003) Modeller: generation and refinement of homology-based protein structure models. *Methods Enzymol*, **374**, 461-491.
- Guex, N. and Peitsch, M.C. (1997) SWISS-MODEL and the Swiss-PdbViewer: an environment for comparative protein modeling. *Electrophoresis*, **18**, 2714-2723.
- Guindon, S. and Gascuel, O. (2003) A simple, fast, and accurate algorithm to estimate large phylogenies by maximum likelihood. *Syst Biol*, **52**, 696-704.
- Jones, D.T. (1999) GenTHREADER: an efficient and reliable protein fold recognition method for genomic sequences. *J Mol Biol*, **287**, 797-815.
- Karplus, K., Karchin, R., Draper, J., Casper, J., Mandel-Gutfreund, Y., Diekhans, M. and Hughey, R. (2003) Combining local-structure, fold-recognition, and new fold methods for protein structure prediction. *Proteins*, **53 Suppl 6**, 491-496.

- Kelley, L.A., MacCallum, R.M. and Sternberg, M.J. (2000) Enhanced genome annotation using structural profiles in the program 3D-PSSM. *J Mol Biol*, **299**, 499-520.
- Le, S.Q. and Gascuel, O. (2008) An improved general amino acid replacement matrix. *Mol Biol Evol*, **25**, 1307-1320.
- Lundstrom, J., Rychlewski, L., Bujnicki, J. and Elofsson, A. (2001) Pcons: a neural-network-based consensus predictor that improves fold recognition. *Protein Sci*, **10**, 2354-2362.
- McGuffin, L.J., Bryson, K. and Jones, D.T. (2000) The PSIPRED protein structure prediction server. *Bioinformatics*, **16**, 404-405.
- Meiler, J. and Baker, D. (2003) Coupled prediction of protein secondary and tertiary structure. *Proc Natl Acad Sci U S A*, **100**, 12105-12110.
- Ouali, M. and King, R.D. (2000) Cascaded multiple classifiers for secondary structure prediction. *Protein Sci*, **9**, 1162-1176.
- Pawlowski, M., Gajda, M.J., Matlak, R. and Bujnicki, J.M. (2008) MetaMQAP: a meta-server for the quality assessment of protein models *BMC Bioinformatics*, **9**, 403.
- Romero, P., Obradovic, Z. and Dunker, A.K. (2004) Natively disordered proteins: functions and predictions. *Appl Bioinformatics*, **3**, 105-113.
- Rost, B., Yachdav, G. and Liu, J. (2004) The PredictProtein server. *Nucleic Acids Res*, **32**, W321-326.
- Rychlewski, L., Jaroszewski, L., Li, W. and Godzik, A. (2000) Comparison of sequence profiles. Strategies for structural predictions using sequence information. *Protein Sci*, **9**, 232-241.
- Schmidt, H.A., Strimmer, K., Vingron, M. and von Haeseler, A. (2002) TREE-PUZZLE: maximum likelihood phylogenetic analysis using quartets and parallel computing. *Bioinformatics*, **18**, 502-504.
- Shi, J., Blundell, T.L. and Mizuguchi, K. (2001) FUGUE: sequence-structure homology recognition using environment-specific substitution tables and structure-dependent gap penalties. *J Mol Biol*, **310**, 243-257.
- Viitanen, P.V., Lubben, T.H., Reed, J., Goloubinoff, P., O'Keefe, D.P. and Lorimer, G.H. (1990) Chaperonin-facilitated refolding of ribulosebiphosphate carboxylase and ATP hydrolysis by chaperonin 60 (groEL) are K<sup>+</sup> dependent. *Biochemistry*, **29**, 5665-5671.
- Ward, J.J., McGuffin, L.J., Bryson, K., Buxton, B.F. and Jones, D.T. (2004) The DISOPRED server for the prediction of protein disorder. *Bioinformatics*, **20**, 2138-2139.
- Whelan, S. and Goldman, N. (2001) A general empirical model of protein evolution derived from multiple protein families using a maximum-likelihood approach. *Mol Biol Evol*, **18**, 691-699.
- Zhou, H. and Zhou, Y. (2004) Single-body residue-level knowledge-based energy score combined with sequence-profile and secondary structure information for fold recognition. *Proteins*, **55**, 1005-1013.

Fig. S1

|                        |     | I                                                                                 | II     | III | IV |
|------------------------|-----|-----------------------------------------------------------------------------------|--------|-----|----|
| <i>E. coli</i>         | 2   | DYFTLFLGLP-----ARYQLDTQALSLRFQDLQRQYHPDKFASC-----SQAEQLAAVQQSATINQAWQTLRHPLMRA    | 68     |     |    |
| <i>S. cerevisiae</i>   | 13  | TFYELEPKTFFKKL---PIWTIDQSLRKEYRQLQAQHHPDMA-----QQGSEQSSTLNQAYHTLKDPLRRS           | 76     |     |    |
| <i>L. kluyveri</i>     | 13  | NFYQLFPKTFPKGK---PQWTVDLRLRQETRKQLQAISHPDAQ-----GSTTNDSSSTLNKRAYHTLRQPLTRS        | 77     |     |    |
| <i>C. albicans</i>     | 21  | SFYELFPKNFPHGCGPPQDSFIVNDKSLRREYRSLQSESHPDI-----SSDTIKSSNINRAYTTLKKNPYTRI         | 86     |     |    |
| <i>C. parapsilosis</i> | 31  | SYFKLEPHNFPQCGPPKDPFFINEKQLRKEYRTLQSSNHPDW-----SSDTIASLNINQAFTHLRNPLYLRL          | 96     |     |    |
| <i>Y. lipolytica</i>   | 10  | SFYSYEPKTLDPGAPPKGFELDPRALRNEFLRLQSQYHPDKLRQLTEBQRQGMSMEELEQRSADLNKRAYKALCDPLQRA  | 89     |     |    |
| <i>S. sclerotiorum</i> | 68  | THYDLFPLTLPRGPPPSGPFHIDIRALRNEFLRLQAGAHDPVHS-----SSNKSRAEATSALINRAYSRTLQSPPLQRA   | 139    |     |    |
| <i>G. zeae</i>         | 86  | THYGLFPETLDPGPPAGHFPINRALRREFLRLQARAHDPDMHGS-----QNKARAEAMSALINRAYSRTLSNPPLQRA    | 157    |     |    |
| <i>A. niger</i>        | 74  | NHYTLFRKQTLRACPPSPSPSIPTADLRREFLRWQSLIHDPKYPQ-----GPQKQAEALSARINRAYSRTLSDPLQRA    | 146    |     |    |
| <i>A. oryzae</i>       | 88  | NHYTLFPKTLRACPPSPSPPHISVSDLRPEFLQLQCTIHPDKYPP-----GPSKQAEALSARINRAYSRTLSDPLQRA    | 160    |     |    |
| <i>S. pombe</i>        | 61  | NFYKQFEGDISDPPP-KGPFIDIDLGALKSSYLKMKTLHPDVAQ-----GKDAALAQRDSAELSRAYNTLKAPLTRA     | 131    |     |    |
| <i>H. sapiens</i>      | 72  | DYFSLMDCN-----RSFRVDTAKLRQHRVQQLQLRVHPDFFFSQR-----SQTERDFSEKHS*TLWMDAYRTLLAPL*SRG | 138    |     |    |
|                        |     |                                                                                   | ***    | *   |    |
|                        |     | IV                                                                                | LINKER | V   | VI |
| <i>E. coli</i>         | 69  | EYLLSL-HGFDLASQHTVRD-----TAFLLMEQLELRBELDEIEQARD-EARLESFIK-RVKKMFD                | 127    |     |    |
| <i>S. cerevisiae</i>   | 77  | QYMLKLLRNIDLTLQEQTSNEVTTSD-----PQLLLKVLVDIHD ELSQMD---D-EAGVKLLEK-QNKERIQD        | 137    |     |    |
| <i>L. kluyveri</i>     | 78  | QYLLQT-QAHIDLKQVASEITQQD-----PELLMTVLDIHQLESIT---T-EEDLHQISK-ENKQRMR              | 138    |     |    |
| <i>C. albicans</i>     | 87  | AHFHIL-KSPNHVNIITDDAVAKKLIKMYQKRSMEASMNKYKEMLMQVMEBAHQLELARS---ENELETLEA-ENKEIRKT | 160    |     |    |
| <i>C. parapsilosis</i> | 97  | AHLIKLLHGVDTITDDAVSKSMIAKFNSSDANAMAY---KSMLLQVMEBAHQLEFAEK-----EQELDELEDENNDR     | 165    |     |    |
| <i>Y. lipolytica</i>   | 90  | IHLIQN-RCIDVDEDKKDEEDISSGPPKGVED-----MEALMEIMEVHEAIEEATE---QSQIESLKE-ENAKRIEA     | 156    |     |    |
| <i>S. sclerotiorum</i> | 140 | QYLLGL-QCIDVHDESGKTGAE-----EGDKELMEVLESTREEMEVQVE-EGDLDAKV-RNEERIAN               | 199    |     |    |
| <i>G. zeae</i>         | 158 | QYLLSL-RCVDVANDETLKVEE-----PELLMLVLEAREEIEDAEK---EEDLDEPRA-ANDARIAE               | 214    |     |    |
| <i>A. niger</i>        | 147 | QYLLREMHCIDVTAEDGASKHALD-----AETLMEVMEVQETIEEVVDSGEDAAAAEEKINELKVENQGR            | 211    |     |    |
| <i>A. oryzae</i>       | 161 | QYLLREMHDIDVTAEDGAAHHALD-----PETLMEVMEVQETIEEVGAEPCAESTIABLKK-QNETRVVE            | 224    |     |    |
| <i>S. pombe</i>        | 132 | EYLLQL-QGINPVSEDISNSD-----PEFLMEIMDVHBMISASPD--S-PEKLLQLSQ-ENQGRVQ                | 188    |     |    |
| <i>H. sapiens</i>      | 139 | LYLLKL-HGIEIPERTDYEMD-----RQFLIEIMEINEKLAEAE---S-EAAMKEIES-IVKAKQKE               | 194    |     |    |
|                        |     | VI                                                                                | VII    |     |    |
| <i>E. coli</i>         | 128 | RHQLMVEQLDNE----TWDAAADTCRKLRFELDKLRSSAQLEEKLLDF----                              | 171    |     |    |
| <i>S. cerevisiae</i>   | 138 | IEAQLGQCYNDK----DYAAAVKLTVELRYVYMLAKAFKDMAPCKQLEMNH-                              | 184    |     |    |
| <i>L. kluyveri</i>     | 139 | VQELDDCYANH----DFETEARLTIELRYVVMWDNAIKGEWEPCKPVHLTH-                              | 185    |     |    |
| <i>C. albicans</i>     | 161 | TEERINQSLKNTPI--DWEELMMDAIRLRYVVMNIQNGIKDWEPCPKPVHLTH-                            | 209    |     |    |
| <i>C. parapsilosis</i> | 166 | IKQAEKIELELKKPEIDWD ELITDAIKLRYVVMNINQNGIKDWEPCPKPVHLTH-                          | 217    |     |    |
| <i>Y. lipolytica</i>   | 157 | SIKELTSAFASD----DLDRKAAATILLRYVVMNTHSALDQWEACKFNPNVNH-                            | 203    |     |    |
| <i>S. sclerotiorum</i> | 200 | CEDNVGKALESG----DLDTARRETVRLRYVVMVWVDSLHAWERCKPVVMVH-                             | 246    |     |    |
| <i>G. zeae</i>         | 215 | SEQVLEHAFRHD----DIEAAKHEAVRLRYVVMIKESLDNWESEKPIVLQH-                              | 261    |     |    |
| <i>A. niger</i>        | 212 | VEECVRLGAEAFDKG--DIEELARRECVRLRYVVMYSVCEGLREWEPCNREIRL--                          | 260    |     |    |
| <i>A. oryzae</i>       | 225 | CVEKLANAFDAG----DLESARQECVRLRYVVMIAQGLKEWEPCLTEIRLVH                              | 272    |     |    |
| <i>S. pombe</i>        | 189 | EINEIRKAMESS----NWDSALLYVMNRYVVMNTIDKILHDL-----                                   | 225    |     |    |
| <i>H. sapiens</i>      | 195 | FTDNVSSAFBQD----DFEBAKEILTMRVYFSMIEBKIKLKKIPL-----                                | 235    |     |    |

Fig. S2

**A**

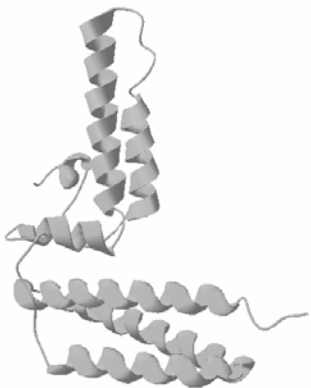

*E. coli*

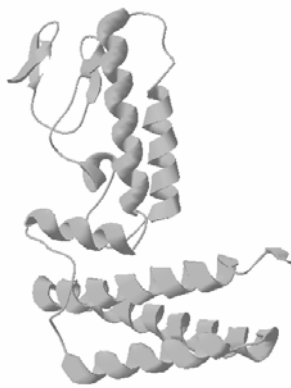

*H. sapiens*

**B**

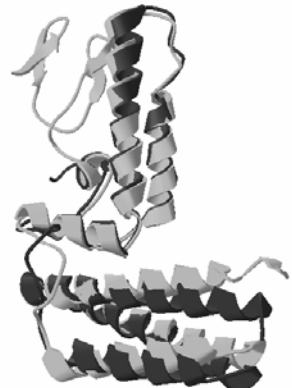

*H. sapiens*

**C**

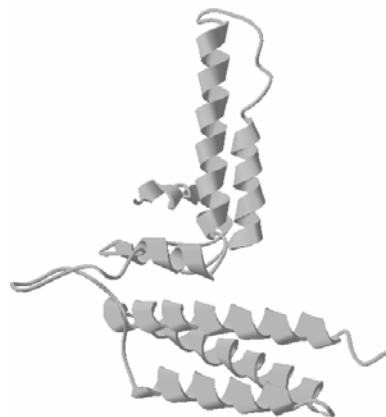

*Y. lipolytica*

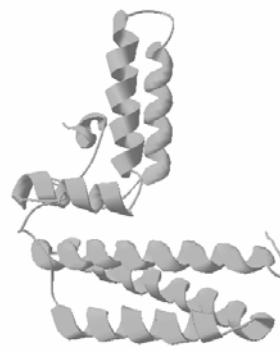

*S. cerevisiae*

Fig. S3

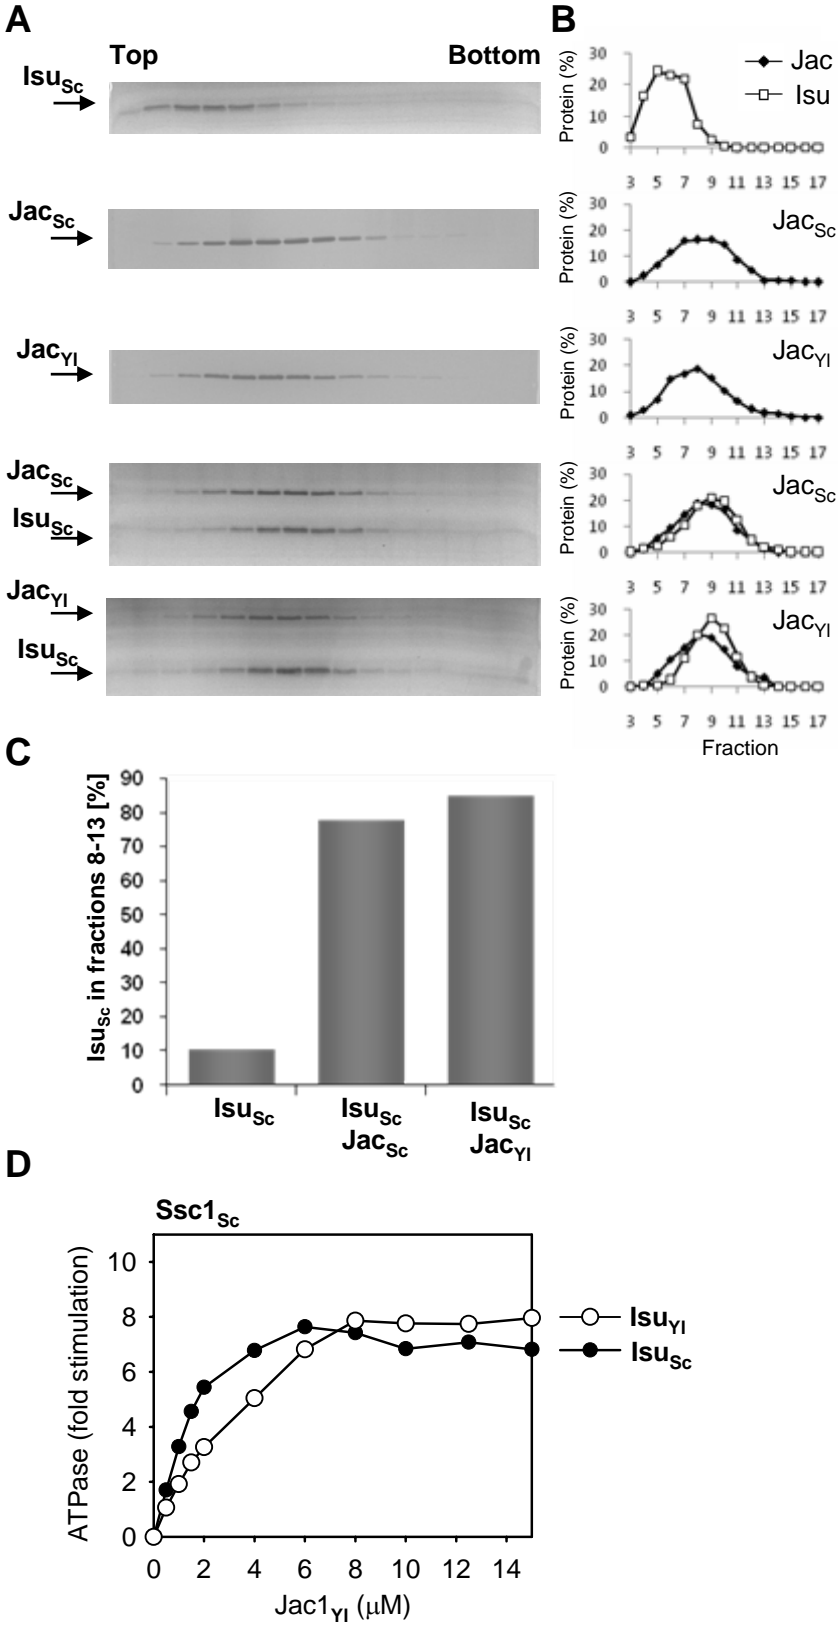

**Tab. S1** Kinetic parameters of stimulation of ATPase activity by  $Jac1_{Y1}$ ,  $Jac1_{Sc}$  and chimerical  $Jac1$  proteins.

| <b>Ssc1/Jac1</b>                                 | <b>MS (S.E.)</b> | <b><math>C_{0.5}</math> (S.E.)</b> |
|--------------------------------------------------|------------------|------------------------------------|
| <i>Jac1<sub>Y1</sub></i>                         | 8.28 (0.47)      | 2.16 (0.42)                        |
| <i>Jac1<sub>Sc</sub></i>                         | 3.29 (0.40)      | 6.71 (1.83)                        |
| <i>Jac1<sub>Sc</sub>Y23</i>                      | 10.54 (0.67)     | 5.72 (0.87)                        |
| <i>Jac1<sub>Sc</sub>Y23<math>\Delta</math>13</i> | n.d.*            | n.d.*                              |

  

| <b>Ssq1/Jac1</b>                                 | <b>MS (S.E.)</b> | <b><math>C_{0.5}</math> (S.E.)</b> |
|--------------------------------------------------|------------------|------------------------------------|
| <i>Jac1<sub>Y1</sub></i>                         | 4.11 (0.80)      | 6.14 (1.480)                       |
| <i>Jac1<sub>Sc</sub></i>                         | 10.36 (0.28)     | 0.050 (0.007)                      |
| <i>Jac1<sub>Sc</sub>Y23</i>                      | 9.32 (0.33)      | 0.054 (0.010)                      |
| <i>Jac1<sub>Sc</sub>Y23<math>\Delta</math>13</i> | 9.84 (0.17)      | 1.010 (0.068)                      |

Maximal Stimulation (MS) and  $Jac1$  concentration giving half-maximal stimulation ( $C_{0.5}$ ) were calculated using non-linear regression, as implemented in Sigma-Plot, by fitting Michaelis-Menten hyperbolic equation to data presented at Fig. 2A. Standard error (S.E) of estimated parameter is given for each MS and  $C_{0.5}$  value.

\*- not determinable.



**Table S2**

List of species and parameters values from Fig. 3A

| Species                           | D-S * | Distance# | Species                             | D-S* | Distance# |
|-----------------------------------|-------|-----------|-------------------------------------|------|-----------|
| <b>Saccharomyces (11 species)</b> |       |           | <b>Aspergillus (11 species)</b>     |      |           |
| Saccharomyces cerevisiae          | 8     | 0         | Aspergillus oryzae                  | 14   | 1,76      |
| Saccharomyces paradoxus           | 8     | 0,07      | Histoplasma capsulatum              | 14   | 1,79      |
| Saccharomyces mikatae             | 8     | 0,11      | Aspergillus nidulans                | 14   | 1,97      |
| Saccharomyces kudriavzevii        | 8     | 0,21      | Coccidioides immitis                | 14   | 2,00      |
| Saccharomyces bayanus             | 8     | 0,34      | Aspergillus clavatus                | 14   | 2,02      |
| Saccharomyces castellii           | 11    | 0,65      | Aspergillus fumigatus               | 14   | 1,99      |
| Candida glabrata                  | 12    | 0,99      | Aspergillus terreus                 | 14   | 2,04      |
| Lachancea kluyveri                | 9     | 1,01      | Neosartorya fischeri                | 14   | 2,05      |
| Kluyveromyces lactis              | 9     | 1,05      | Aspergillus flavus                  | 14   | 2,09      |
| Lachancea waltii                  | 9     | 1,07      | Aspergillus niger                   | 14   | 2,48      |
| Eremothecium gossypii             | 8     | 1,41      | Uncinocarpus reesii                 | 14   | 3,91      |
| <b>Candida (8 species)</b>        |       |           | <b>Yarrowia (1 species)</b>         |      |           |
| Candida albicans                  | 7     | 1,60      | Yarrowia lipolytica                 | 21   | 2,01      |
| Loderomyces elongisporus          | 7     | 1,96      | <b>Other fungi (4 species)</b>      |      |           |
| Candida dubliniensis              | 7     | 2,07      | Schizosaccharomyces pombe           | 13   | 2,43      |
| Clavispora lusitaniae             | 2     | 2,12      | Ustilago maydis                     | 16   | 2,44      |
| Pichia guilliermondii             | 27    | 2,21      | Cryptococcus neoformans             | 16   | 2,80      |
| Candida parapsilosis              | 7     | 2,15      | Coprinopsis cinerea                 | 16   | 3,18      |
| Debaromyces hansenii              | 20    | 2,31      | <b>Other eukaryotes (8 species)</b> |      |           |
| Candida tropicalis                | 7     | 2,73      | Homo sapiens                        | 16   | 2,58      |
| <b>Fusarium (9 species)</b>       |       |           | Caenorhabditis elegans              | 16   | 2,71      |
| Trichoderma reesei                | 23    | 1,55      | Caenorhabditis briggsae             | 16   | 2,92      |
| Gibberella moniliformis           | 13    | 1,74      | Danio rerio                         | 16   | 3,43      |
| Gibberella zeae                   | 13    | 1,74      | Xenopus laevis                      | 16   | 3,69      |
| Neurospora crassa                 | 30    | 1,95      | Mus musculus                        | 16   | 3,80      |
| Sclerotinia sclerotiorum          | 13    | 1,98      | Drosophila melanogaster             | 16   | 4,03      |
| Botryotinia fuckeliana            | 13    | 2,25      | Arabidopsis thaliana                | 16   | 4,14      |
| Magnaporthe grisea                | 27    | 2,26      |                                     |      |           |
| Podospora anserina                | 17    | 2,49      |                                     |      |           |
| Phaeosphaeria nodorum             | 13    | 2,71      |                                     |      |           |

\* - D-S - number of residues between conserved Asp of HPD motif and conserved Ser of helix III

# - Distance – evolutionary protein distance from Jac1<sub>sc</sub> (details in “Suppl. Methods”)
